# Supplementary material
Source: PubMed Central journal article supplement (PMC3781967)
Supplement: 45d0709c7779764e2b08a06573565338_genetics.113.155408-6.pdf [file 45d0709c7779764e2b08a06573565338_genetics.113.155408-6.pdf]

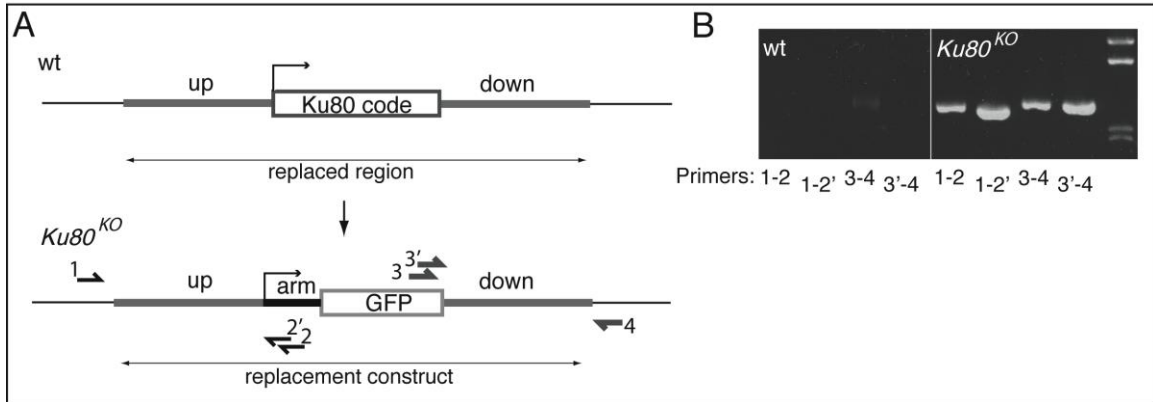

**Figure S1** Molecular characterization of Ku80 deletion

- A. Schematics of Ku80 region. Top: the wt Ku80 region with upstream (up) and downstream (dn) sequences (~2.5 kb each) that flank the coding region; “replacement region” designates sequences replaced by ends-out targeting. Bottom: the Ku80 region in *Ku80 $\Delta$*  mutant; the up and dn flanking fragments were used in ends-out gene targeting, in which the Ku80 coding sequence was replaced by an arm-GFP marker gene; “replacement construct” designates sequences brought in by ends-out targeting. The flanking sequences are unaltered from wt. Half-arrows indicate primers used for the PCRs in B. Note that primer 1 and 4 reside outside the Ku80 region. Primers 2 and 2' reside within armadillo promoter sequences, while primer 3 and 3' are within GFP.
- B. PCR products from four test PCRs for wt and *Ku80 $\Delta$*  lines. Primer pairs used for each PCR are indicated below the image, and their locations are specified within the schematic in A. For exact primer sequences see the Supplemental Methods.
