# Supplementary material
Source: PubMed Central journal article supplement (PMC3781967)
Supplement: 552c6eb984b040145fadc9291d88dabb_genetics.113.155408-4.pdf [file 552c6eb984b040145fadc9291d88dabb_genetics.113.155408-4.pdf]

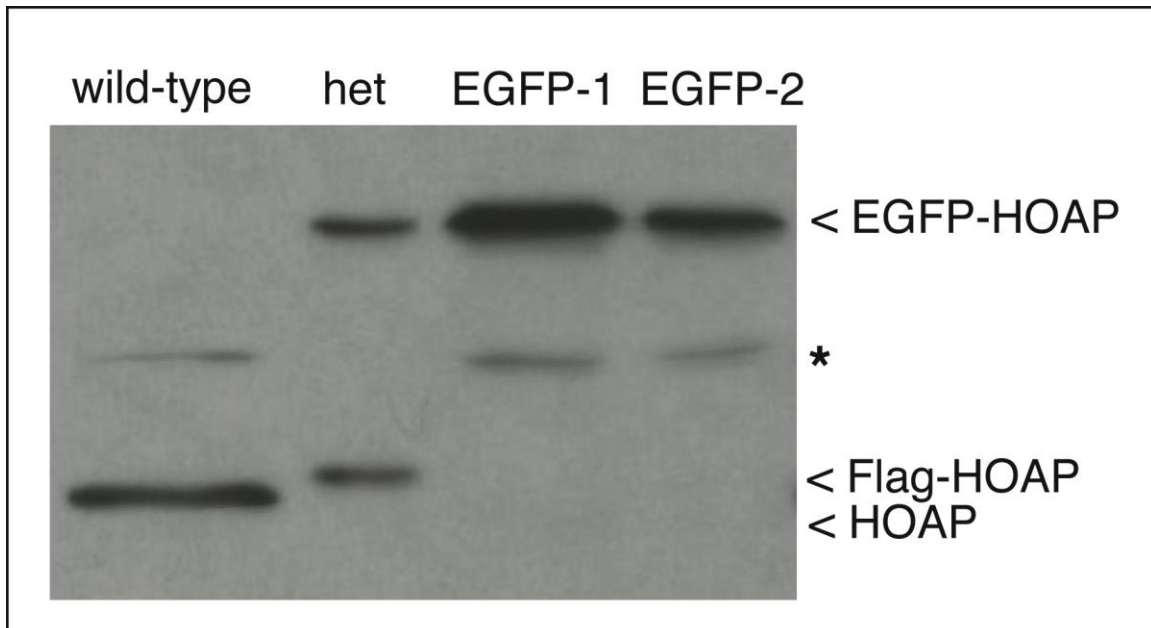

**Figure S2** EGFP-HOAP is produced at normal level

Western Blot was performed on embryos extracts from flies of the indicated genotype and probed using rabbit anti-HOAP antibody. Lanes are labeled at the top: 1) wild-type; 2) het: heterozygous line, which carries both EGFP-HOAP and a Flag-tagged HOAP (accounting for slightly larger HOAP band); 3) EGFP-1 and EGFP-2: two independent EGFP-HOAP lines which carry only the tagged version of HOAP. The major band corresponds to a cumulative size of HOAP plus EGFP. A non-specific band is labeled with an asterisk (\*).
